# Supplementary material
Source: MDPI journal article supplement (https://www.mdpi.com/2073-4441/13/23/3339)
Supplement: s1 [file s1]

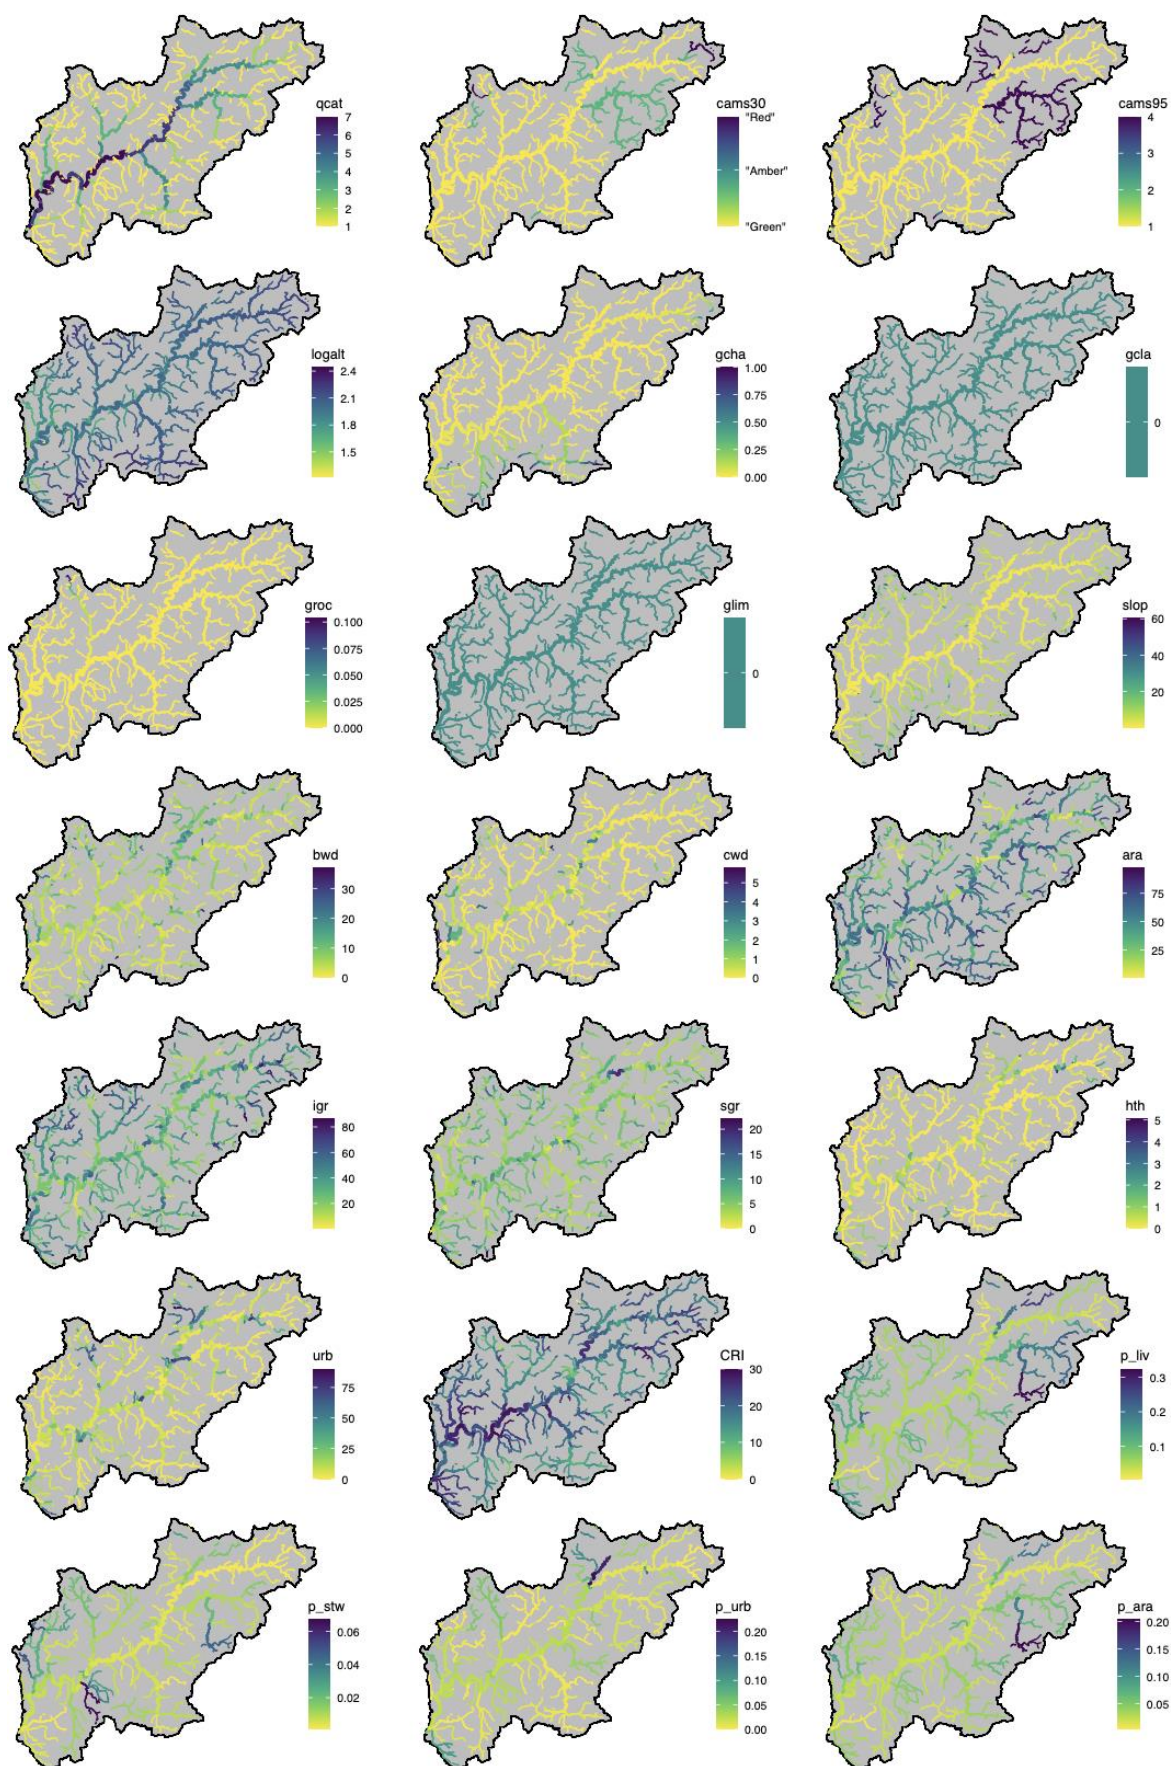

**Supplementary Figure S1.** Environmental variables used for modelling recovery potential in the Warwickshire Avon case study catchment. For abbreviations and units see main text Table 1.

**Supplementary Table S1.** Summary statistics for the linear model predicting recovery potential as a function of environmental variables without interactions. For abbreviations and units see main text Table 1.

| <i>Predictors</i>                        | <b>logit(recovery potential)</b> |                |                  |
|------------------------------------------|----------------------------------|----------------|------------------|
|                                          | <i>Estimates</i>                 | <i>CI</i>      | <i>p</i>         |
| (Intercept)                              | -2.75                            | -12.49 – 6.99  | 0.579            |
| CRI                                      | 0.03                             | 0.01 – 0.05    | <b>&lt;0.001</b> |
| logalt                                   | -0.92                            | -1.49 – -0.35  | <b>0.002</b>     |
| gcha                                     | 0.87                             | 0.28 – 1.47    | <b>0.004</b>     |
| groc                                     | -8.38                            | -19.42 – 2.65  | 0.136            |
| qcat                                     | -0.03                            | -0.08 – 0.01   | 0.175            |
| slop                                     | -0.01                            | -0.02 – 0.01   | 0.341            |
| p_liv                                    | 1.99                             | -0.56 – 4.53   | 0.126            |
| p_stw                                    | -9.63                            | -16.21 – -3.05 | <b>0.004</b>     |
| p_urb                                    | 6.82                             | 4.27 – 9.38    | <b>&lt;0.001</b> |
| p_ara                                    | -4.19                            | -9.26 – 0.88   | 0.105            |
| cams30                                   | 0.22                             | 0.08 – 0.35    | <b>0.002</b>     |
| cams95                                   | -0.00                            | -0.09 – 0.09   | 0.976            |
| bwd                                      | 0.05                             | -0.05 – 0.15   | 0.319            |
| ara                                      | 0.03                             | -0.06 – 0.13   | 0.482            |
| igr                                      | 0.04                             | -0.06 – 0.14   | 0.417            |
| sgr                                      | 0.01                             | -0.09 – 0.11   | 0.914            |
| urb                                      | 0.03                             | -0.07 – 0.13   | 0.536            |
| Observations                             | 739                              |                |                  |
| R <sup>2</sup> / R <sup>2</sup> adjusted | 0.137 / 0.117                    |                |                  |

**Supplementary Table S2.** Summary statistics for the linear model predicting recovery potential as a function of environmental variables with all possible two-way interactions. For abbreviations and units see main text Table 1.

| <i>Predictors</i> | <b>logit(recovery potential)</b> |                     |                  |
|-------------------|----------------------------------|---------------------|------------------|
|                   | <i>Estimates</i>                 | <i>CI</i>           | <i>p</i>         |
| (Intercept)       | -86.18                           | -216.28 – 43.91     | 0.194            |
| CRI               | 0.99                             | -1.15 – 3.13        | 0.365            |
| logalt            | 24.67                            | -37.06 – 86.41      | 0.433            |
| gcha              | 52.06                            | -35.86 – 139.98     | 0.245            |
| groc              | 3005.41                          | -9081.45 – 15092.26 | 0.625            |
| qcat              | -1.00                            | -8.21 – 6.21        | 0.786            |
| slop              | 0.41                             | -1.77 – 2.60        | 0.710            |
| p_liv             | -226.17                          | -629.70 – 177.35    | 0.271            |
| p_stw             | 253.08                           | -788.88 – 1295.04   | 0.634            |
| p_urb             | 637.90                           | 363.26 – 912.55     | <b>&lt;0.001</b> |
| p_ara             | -15.11                           | -1048.58 – 1018.36  | 0.977            |
| cams30            | 1.13                             | -34.69 – 36.95      | 0.950            |
| cams95            | 4.15                             | -15.66 – 23.97      | 0.681            |
| bwd               | 0.90                             | -0.57 – 2.36        | 0.230            |
| ara               | 0.91                             | -0.40 – 2.22        | 0.171            |
| igr               | 0.95                             | -0.35 – 2.26        | 0.150            |
| sgr               | 0.23                             | -1.22 – 1.68        | 0.755            |
| urb               | 0.92                             | -0.39 – 2.23        | 0.168            |
| CRI * logalt      | 0.11                             | -0.00 – 0.23        | 0.058            |
| CRI * gcha        | -0.17                            | -0.40 – 0.06        | 0.141            |
| CRI * groc        | 1.56                             | -11.18 – 14.31      | 0.810            |
| CRI * qcat        | -0.01                            | -0.03 – -0.00       | <b>0.006</b>     |
| CRI * slop        | -0.00                            | -0.01 – -0.00       | <b>0.032</b>     |

|                 |          |                     |                  |
|-----------------|----------|---------------------|------------------|
| CRI * p_liv     | -0.21    | -0.73 – 0.31        | 0.432            |
| CRI * p_stw     | 1.59     | -0.05 – 3.22        | 0.057            |
| CRI * p_urb     | 0.03     | -0.61 – 0.67        | 0.924            |
| CRI * p_ara     | 0.15     | -0.91 – 1.21        | 0.781            |
| CRI * cams30    | 0.03     | -0.03 – 0.09        | 0.321            |
| CRI * cams95    | -0.02    | -0.05 – 0.00        | 0.087            |
| CRI * bwd       | -0.01    | -0.03 – 0.01        | 0.367            |
| CRI * ara       | -0.01    | -0.03 – 0.01        | 0.300            |
| CRI * igr       | -0.01    | -0.03 – 0.01        | 0.286            |
| CRI * sgr       | -0.01    | -0.03 – 0.01        | 0.488            |
| CRI * urb       | -0.01    | -0.03 – 0.01        | 0.252            |
| logalt * gcha   | -2.65    | -11.28 – 5.99       | 0.547            |
| logalt * groc   | -207.90  | -2104.05 – 1688.25  | 0.830            |
| logalt * qcat   | -0.22    | -0.69 – 0.26        | 0.371            |
| logalt * slop   | -0.10    | -0.22 – 0.02        | 0.090            |
| logalt * p_liv  | -5.76    | -38.11 – 26.58      | 0.726            |
| logalt * p_stw  | 143.24   | 64.70 – 221.79      | <b>&lt;0.001</b> |
| logalt * p_urb  | -35.61   | -69.67 – -1.55      | <b>0.040</b>     |
| logalt * p_ara  | 56.45    | -25.38 – 138.29     | 0.176            |
| logalt * cams30 | 1.08     | -4.29 – 6.45        | 0.693            |
| logalt * cams95 | 0.22     | -1.80 – 2.24        | 0.831            |
| logalt * bwd    | -0.32    | -1.03 – 0.39        | 0.381            |
| logalt * ara    | -0.29    | -0.91 – 0.33        | 0.354            |
| logalt * igr    | -0.31    | -0.92 – 0.30        | 0.322            |
| logalt * sgr    | -0.15    | -0.81 – 0.51        | 0.660            |
| logalt * urb    | -0.28    | -0.90 – 0.34        | 0.373            |
| gcha * groc     | 38288.08 | -7877.63 – 84453.79 | 0.104            |

|               |           |                       |                  |
|---------------|-----------|-----------------------|------------------|
| gcha * qcat   | -2.55     | -4.15 – -0.96         | <b>0.002</b>     |
| gcha * slop   | -0.00     | -0.07 – 0.07          | 0.989            |
| gcha * p_liv  | -122.73   | -197.62 – -47.83      | <b>0.001</b>     |
| gcha * p_stw  | -129.23   | -212.00 – -46.46      | <b>0.002</b>     |
| gcha * p_urb  | 172.00    | 61.70 – 282.31        | <b>0.002</b>     |
| gcha * p_ara  | 93.05     | -6.66 – 192.77        | 0.067            |
| gcha * cams30 | -0.68     | -2.51 – 1.14          | 0.461            |
| gcha * cams95 | -1.96     | -3.05 – -0.87         | <b>&lt;0.001</b> |
| gcha * bwd    | -0.34     | -1.19 – 0.52          | 0.439            |
| gcha * ara    | -0.34     | -1.15 – 0.47          | 0.411            |
| gcha * igr    | -0.34     | -1.16 – 0.47          | 0.407            |
| gcha * sgr    | -0.40     | -1.26 – 0.45          | 0.356            |
| gcha * urb    | -0.33     | -1.16 – 0.49          | 0.425            |
| groc * qcat   | 32.39     | -50.78 – 115.56       | 0.445            |
| groc * slop   | 2.86      | -14.19 – 19.91        | 0.742            |
| groc * p_liv  | 31110.06  | -27854.89 – 90075.01  | 0.301            |
| groc * p_stw  | 38529.40  | -52952.26 – 130011.06 | 0.408            |
| groc * p_urb  | -21877.46 | -68321.54 – 24566.62  | 0.355            |
| groc * p_ara  | -92419.23 | -221633.57 – 36795.11 | 0.161            |
| groc * cams30 | -781.70   | -4946.68 – 3383.27    | 0.713            |
| groc * cams95 | 725.74    | -3415.45 – 4866.93    | 0.731            |
| groc * bwd    | -21.12    | -115.73 – 73.49       | 0.661            |
| groc * ara    | -22.86    | -119.68 – 73.96       | 0.643            |
| groc * igr    | -23.07    | -121.00 – 74.86       | 0.644            |
| groc * sgr    | -25.82    | -134.97 – 83.33       | 0.642            |
| groc * urb    | -23.94    | -124.36 – 76.48       | 0.640            |
| qcat * slop   | 0.01      | -0.03 – 0.04          | 0.752            |

|                |         |                  |                  |
|----------------|---------|------------------|------------------|
| qcat * p_liv   | -3.61   | -7.90 – 0.68     | 0.099            |
| qcat * p_stw   | -14.76  | -31.31 – 1.79    | 0.080            |
| qcat * p_urb   | 0.41    | -3.10 – 3.93     | 0.817            |
| qcat * p_ara   | 16.14   | 6.47 – 25.82     | <b>0.001</b>     |
| qcat * cams30  | 0.11    | -0.34 – 0.57     | 0.624            |
| qcat * cams95  | -0.21   | -0.40 – -0.02    | <b>0.029</b>     |
| qcat * bwd     | 0.02    | -0.06 – 0.09     | 0.665            |
| qcat * ara     | 0.02    | -0.05 – 0.09     | 0.630            |
| qcat * igr     | 0.02    | -0.05 – 0.09     | 0.645            |
| qcat * sgr     | 0.03    | -0.05 – 0.10     | 0.470            |
| qcat * urb     | 0.02    | -0.05 – 0.09     | 0.635            |
| slop * p_liv   | 0.21    | -0.48 – 0.90     | 0.552            |
| slop * p_stw   | -0.78   | -1.99 – 0.42     | 0.202            |
| slop * p_urb   | 0.07    | -0.77 – 0.92     | 0.866            |
| slop * p_ara   | -0.05   | -1.54 – 1.44     | 0.945            |
| slop * cams30  | -0.00   | -0.05 – 0.05     | 0.975            |
| slop * cams95  | -0.02   | -0.05 – 0.01     | 0.188            |
| slop * bwd     | -0.00   | -0.03 – 0.02     | 0.889            |
| slop * ara     | -0.00   | -0.02 – 0.02     | 0.900            |
| slop * igr     | -0.00   | -0.02 – 0.02     | 0.904            |
| slop * sgr     | 0.00    | -0.02 – 0.02     | 0.873            |
| slop * urb     | -0.00   | -0.02 – 0.02     | 0.894            |
| p_liv * p_stw  | 807.12  | 437.42 – 1176.81 | <b>&lt;0.001</b> |
| p_liv * p_urb  | -142.35 | -286.86 – 2.16   | 0.054            |
| p_liv * p_ara  | -194.20 | -328.28 – -60.12 | <b>0.005</b>     |
| p_liv * cams30 | -24.06  | -86.24 – 38.12   | 0.448            |
| p_liv * cams95 | -0.18   | -20.35 – 19.99   | 0.986            |

|                |        |                  |                  |
|----------------|--------|------------------|------------------|
| p_liv * bwd    | 3.01   | -1.13 – 7.16     | 0.154            |
| p_liv * ara    | 2.76   | -1.19 – 6.71     | 0.170            |
| p_liv * igr    | 2.83   | -1.11 – 6.77     | 0.158            |
| p_liv * sgr    | 2.49   | -1.63 – 6.60     | 0.236            |
| p_liv * urb    | 2.66   | -1.32 – 6.65     | 0.190            |
| p_stw * p_urb  | 961.70 | 279.01 – 1644.39 | <b>0.006</b>     |
| p_stw * p_ara  | -16.99 | -899.58 – 865.60 | 0.970            |
| p_stw * cams30 | -12.15 | -159.99 – 135.69 | 0.872            |
| p_stw * cams95 | -3.09  | -54.25 – 48.07   | 0.906            |
| p_stw * bwd    | -5.66  | -16.60 – 5.28    | 0.310            |
| p_stw * ara    | -6.15  | -16.34 – 4.03    | 0.236            |
| p_stw * igr    | -6.27  | -16.45 – 3.90    | 0.226            |
| p_stw * sgr    | -6.56  | -16.64 – 3.52    | 0.202            |
| p_stw * urb    | -6.70  | -16.93 – 3.52    | 0.198            |
| p_urb * p_ara  | 459.20 | -27.51 – 945.91  | 0.064            |
| p_urb * cams30 | 13.52  | -13.88 – 40.92   | 0.333            |
| p_urb * cams95 | -16.29 | -27.14 – -5.43   | <b>0.003</b>     |
| p_urb * bwd    | -5.97  | -8.79 – -3.15    | <b>&lt;0.001</b> |
| p_urb * ara    | -5.69  | -8.35 – -3.03    | <b>&lt;0.001</b> |
| p_urb * igr    | -5.96  | -8.57 – -3.35    | <b>&lt;0.001</b> |
| p_urb * sgr    | -4.98  | -7.89 – -2.08    | <b>0.001</b>     |
| p_urb * urb    | -5.77  | -8.44 – -3.10    | <b>&lt;0.001</b> |
| p_ara * cams30 | 24.03  | -102.00 – 150.07 | 0.708            |
| p_ara * cams95 | -5.12  | -47.15 – 36.92   | 0.811            |
| p_ara * bwd    | -2.06  | -12.80 – 8.68    | 0.707            |
| p_ara * ara    | -1.21  | -11.59 – 9.16    | 0.818            |
| p_ara * igr    | -1.16  | -11.51 – 9.19    | 0.826            |

|                 |       |               |       |
|-----------------|-------|---------------|-------|
| p_ara * sgr     | -2.00 | -12.79 – 8.78 | 0.715 |
| p_ara * urb     | -0.87 | -11.23 – 9.50 | 0.870 |
| cams30 * cams95 | -0.06 | -0.67 – 0.55  | 0.847 |
| cams30 * bwd    | -0.02 | -0.39 – 0.35  | 0.897 |
| cams30 * ara    | -0.03 | -0.40 – 0.33  | 0.858 |
| cams30 * igr    | -0.03 | -0.40 – 0.33  | 0.859 |
| cams30 * sgr    | -0.09 | -0.45 – 0.28  | 0.637 |
| cams30 * urb    | -0.04 | -0.39 – 0.32  | 0.844 |
| cams95 * bwd    | -0.04 | -0.25 – 0.17  | 0.704 |
| cams95 * ara    | -0.03 | -0.22 – 0.17  | 0.803 |
| cams95 * igr    | -0.03 | -0.23 – 0.17  | 0.776 |
| cams95 * sgr    | 0.04  | -0.16 – 0.24  | 0.727 |
| cams95 * urb    | -0.02 | -0.22 – 0.17  | 0.827 |
| bwd * ara       | 0.00  | -0.00 – 0.00  | 0.162 |
| bwd * igr       | 0.00  | -0.00 – 0.00  | 0.301 |
| bwd * sgr       | 0.01  | -0.00 – 0.01  | 0.210 |
| bwd * urb       | 0.00  | -0.00 – 0.00  | 0.951 |
| ara * igr       | -0.00 | -0.00 – 0.00  | 0.420 |
| ara * sgr       | 0.00  | -0.00 – 0.01  | 0.244 |
| ara * urb       | 0.00  | -0.00 – 0.00  | 0.376 |
| igr * sgr       | 0.00  | -0.00 – 0.01  | 0.105 |
| igr * urb       | 0.00  | -0.00 – 0.00  | 0.854 |
| sgr * urb       | 0.00  | -0.00 – 0.01  | 0.298 |

---

Observations      739

R<sup>2</sup> / R<sup>2</sup> adjusted      0.518 / 0.392
